# Supplementary material for: cryoWriter: a blotting free cryo-EM preparation system with a climate jet and cover-slip injector
Source: Royal Society of Chemistry journal article supplement (doi:10.1039/d2fd00066k), 2022-01-01
Supplement: d2fd00066k1.zip [file d2fd00066k1.zip]

Archive with 2 entries (2 files):
- cryoWriter__A_blotting_free_cryo_EM_preparation_system_with_climate_jet_and_cover_slip_injector.pdf
- Figure2.mp4
